# Supplementary material for: Communities of oil palm flower-visiting insects: investigating the covariation of Elaeidobius kamerunicus and other dominant species
Source: PeerJ. 2019 Aug 8;7:e7464. doi: 10.7717/peerj.7464 (PMC6689392; doi:10.7717/peerj.7464)
Supplement: Dataset S1 [file peerj-07-7464-s001.csv]

		Tree age	6 years																		10 years																		16 years
		Plot	M1						M2						M3						R1						R2						R3						T1						T2
		Month of sampling	S1		S2		S3		S1		S2		S3		S1		S2		S3		S1		S2		S3		S1		S2		S3		S1		S2		S3		S1		S2		S3		S1		S2		S3
Order	Famili	Morfospesies	Female	Male	Female	Male	Female	Male	Female	Male	Female	Male	Female	Male	Female	Male	Female	Male	Female	Male	Female	Male	Female	Male	Female	Male	Female	Male	Female	Male	Female	Male	Female	Male	Female	Male	Female	Male	Female	Male	Female	Male	Female	Male	Female	Male	Female	Male	Female
Blattodea	Blatidae	Blatidae.01		1												2		1			1																1	1				2
Coleoptera	Anobiidae	Anobiidae.01				1
	Carabidae	Carabidae.01							2																																				7	1
		Carabidae.02						1
		Carabidae.03											1
		Carabidae.04
	Chyptophagidae	Chyptophagidae.01													1
	Curculionidae	Elaeidobius.kamerunicus	3079	1831	1090	3075	2206	1532	760	1161	1521	1706	3687	3245	6620	2600	3961	3535	3956	3841	835	199	771	562	1451	1402	1325	2936	798	2150	2428	4529	2327	1385	2027	1372	4901	2659	2325	1203	141	2287	5510	5419	10272	4840	3622	5918	7718
	Derodontidae	Derodontidae.01
		Derodontidae.02														1
	Elateridae	Elateridae.01																																									1
		Elateridae.03				1
	Hydrophilidae	Hydrophilidae.01																																		2
		Hydrophilidae.02																																											1
	Meloidae	Meloidae.01																														1
	Mycetophagidae	Mycetophagidae.01																								1					1
		Mycetophagidae.02																			1										1
		Mycetophagidae.03				1																																							1
		Mycetophagidae.04																		1
		Mycetophagidae.05																									1
	Passalidae	Passalidae.01																														1
	Scolytidae	Scolytidae.01																																						1
	Staphylinidae	Staphylinidae.01															1									1		1
		Staphylinidae.02																1									1
		Staphylinidae.04																										1
		StaphylinidaE.05								3																																1
		Staphylinidae.06											1						1																				1	1
		Staphylinidae.07	1																																					1
		Staphylinidae.08
Dermaptera		Dermaptera.01																																				1								1
		Dermaptera.02							1							1							2						1															1
		Dermaptera.03													1																										1
		Dermaptera.04																									1
		Dermaptera.07																													1
Diptera	Asteiidae	Asteiidae.01				1													1																							1
		Asteiidae.02																															1	2
		Asteiidae.04	1	9												1															1
		Asteiidae.05		1															1				1
		Asteiidae.06																																						1
		Asteiidae.07																				1				1																				1
		Asteiidae.08											1									1																				1
	Chaoboridae	Chaoboridae.01
		Chaoboridae.02							1								1																												1
		Chaoboridae.03																							1										1		1		2	5
		Chaoboridae.05				2			1	1		1	6				1			1	4					2		1	2	2		1												2		7	1		7
		Chaoboridae.06												1																																			1
		Chaoboridae.07																												1
		Chaoboridae.08
		Chaoboridae.09																										1
		Chaoboridae.10																																			1
		Chaoboridae.11																1
	Cylindrotomidae	Cylindrotomidae.01	1							1																																				1
		Cylindrotomidae.02			1
		Cylindrotomidae.03																									1
	Dixidae	Dixidae.01																						1		1																					1
	Dolichopodidae	Dolichopodidae.01																			1							2
		Dolichopodidae.02	1	2				1		1		1	1		1	23	1		5	2		5	4	1	1		7	18		2		7	1	1	1					9	1			1	3	5	3	5	1
		Dolichopodidae.05
		Dolichopodidae.06																															1
		Dolichopodidae.07																										1
		Dolichopodidae.08				1		1		2	3	1	1			1			1				2			2		1	1	1	1	2		1		1	1					2			1		1
		Dolichopodidae.09																																										1
		Dolichopodidae.10	4	5	1			1			1				1	4			1		1	1	3	4									2			3				2			1				2
		Dolichopodidae.11								1
		Dolichopodidae.12								1
		Dolichopodidae.13																																		1
	Drosophilidae	Drosophilidae.01											3
		Drosophilidae.02														1
		Drosophilidae.03
		Drosophilidae.04								2						9		3	1
		Drosophilidae.06														2														1
		Drosophilidae.07
		Drosophilidae.08																																														3
		Drosophilidae.09													1							2
		Drosophilidae.10																	1
		Drosophilidae.11														1
		Drosophilidae.12	2	17	2	12	2	2	6	75	2	13	5	10	6	27	9	10	5	8	12	1		1	1	1	2	2		3	1	7	2	7	1	2			3	1		1		3	4	1	1	6	1
		Drosophilidae.13				1
		Drosophilidae.14								2
		Drosophilidae.15																																															1
		Drosophilidae.16																							1
		Scaptodrosophila.01	224	314	29	220	104	406	44	290	78	136	73	364	90	430	121	285	52	437	183	116	67	111	114	441	138	583	21	768	296	851	77	354	59	308	218	231	116	350	4	819	198	430	453	453	230	812	178
	Ephydridae	Ephydridae.01																																1
	Hybotidae	Hybotidae.01									1															1
		Hybotidae.02				1				2	1								2																						1			1
		Hybotidae.04																																														1
	Limoniidae	Limoniidae.01																			2					1	1				1							1	2							2			2
		Limoniidae.02
	Muscidae	Muscidae.01				1																1				1
		Muscidae.02
		Muscidae.03																																1
		Muscidae.04										1												1			1													1				1
		Muscidae.05							1																																1
		Muscidae.06		1				2		2	2	1	1			4		1								3	1		1		3					3				5	1	1					1	1
		Muscidae.07	1									1				1		1							1							1	1				3								1	4
		Muscidae.08				1					1								1								1										2	2				1
		Muscidae.09			1
		Muscidae.10																												1
		Muscidae.11																																								1	1
	Mycetophilidae	Mycetophilidae.01		1	1	1			2	4		3		2	1	9		5	3	1	12	21	3	5	4	13	1	22	2	17	1	3	2	6		11	1	2	3	7	2	15		5	2	2	7	13
		Mycetophilidae.02																											3
		Mycetophilidae.03
		Mycetophilidae.04
	Neriidae	Neriidae.01	2		1	1				2		3		2	6	4	1	2	5	3	1			5			1					1		1	1	3	1										1
	Pediciidae	Pediciidae.01																					1
	Phoridae	Phoridae.01					2	2		1			2			2			1							2			1								1							2	2			1	1
		Phoridae.02																				1						1
		Phoridae.03																	1							1															1
		Phoridae.04											2						1	1					6	1		1								1	1							1	2	1
		Phoridae.05																												2
		Phoridae.06																										1
		Phoridae.08	1	3	3			1	4	3	1	1	11		1	2			1			2	3				2	1	4	1	3		2	1	1	12	6	4	1		2	1	1	4	6	13	6	2
		Phoridae.09			2			5																												3	1								1	3
		Phoridae.10		2	1		1	1	2	20	1	1	1	1				1	1	2											1	3			1	3	1	1				2						1
		Phoridae.11				1
		Phoridae.12
		Phoridae.13																		1
		Phoridae.14																		1
		Phoridae.15	5	1					3	4		1	2			1	2	3									1		3	1	2			1	2	6			2	2
		Phoridae.16																	1																											2
		Phoridae.17																		1
		Phoridae.18																												1
		Phoridae.20																																							1
		Phoridae.21		22
		Phoridae.22																	1
		Phoridae.23																							1							1
		Phoridae.24																1	1																							1
		Phoridae.25
		Phoridae.26																	1
		Phoridae.28																		1
		Phoridae.29																	1
		Phoridae.30													2					1
		Phoridae.31																		1
		Phoridae.32													1						1
		Phoridae.33																									1	1
		Phoridae.35																																											1	1
		Phoridae.36																		1
		Phoridae.37																	1
	Psychodidae	Psychodidae.02																	2											1														2
		Psychodidae.03								1																		1														1		1	21
		Psychodidae.04																																	1							1					1
		Psychodidae.05																																		1									1
	Scatopsidae	Scatopsidae.01		1
	Sciaridae	Sciaridae.01	2				1		4	1	1		5	2		2	1		3	1				3			2			1	1		1						1	5	1		2	1	2	3
		Sciaridae.02			2		1					1		1	3		2	1	10		7		1	3		1	2	1	3		2	1						1	1	1			7	4	1	9			2
		Sciaridae.04							1						3		1			2						1				1				1										2			1		7
		Sciaridae.05														1
	Spharoceridae	haroceridae.01				1		1								2					1
		haroceridae.02		1						4	1
	Stratiomyidae	Stratiomyidae.01																								1
		Stratiomyidae.02					1
	Tanyderidae	Tanyderidae.01																1
	Tanypezidae	Tanypezidae.01	1		2	3				6	1	1		11	1	2		1			3	1	2	1	1	6	1			1	2	1		1			2	2									1
	Tephritidae	Tephritidae.01																																			1
	Tipulidae	Tipulidae.01				1																		1																						1
Hemiptera	Ceratocombidae	Ceratocombidae.01																									1
	Gelastocoridae	Gelastocoridae.01																																				1
	Miridae	Miridae.01																												1
	Reduviidae	Reduviidae.01									1					3		1													1																	1
		Reduviidae.02							1
		Reduviidae.03																									1															1
		Reduviidae.04								1			1		1	3
		Reduviidae.05							1													1
Homoptera		Homoptera.02																				1
		Homoptera.03																							1
		Homoptera.04																								1
		Homoptera.05																								1					1
		Homoptera.06															1									1
		Homoptera.07										1
		Homoptera.10														1															1
		Homoptera.11					1
		Homoptera.12																												1											1
		Homoptera.13																				1
		Homoptera.14													1
		Homoptera.15																		1
		Homoptera.16																		1					1	1
Hymenoptera	Bethylidae	Bethylidae.02																				1
		Bethylidae.04																								1
	Braconidae	Braconidae.01		1		1								1		5	1	1		1	3	3				10		6	2	4		7		3			1	8	2			2	2	9	3	1		3
		Braconidae.02	7	2	5		14	2				2	2		1				1		6	2	5	3	3	3			1		4	1	2		1	1			1	2					1
		Braconidae.03				1																	2
		Braconidae.04																																1
		Braconidae.05																									1
		Braconidae.06																													1
	Ceraphronidae	Ceraphronidae.01																	1
		Ceraphronidae.02															1
	Chalcididae	Chalcididae.01																								2
	Diapriidae	Diapriidae.01																	1	2											2
		Diapriidae.02													2
		Diapriidae.03																									1
		Diapriidae.05																													1
	Eucolidae	Eucolidae.01																															1
	Formicidae	Formicidae.01									1
		Formicidae.02								1								1
		Formicidae.03																1										2																		1
		Formicidae.04							1																					1																			20
		Formicidae.05						1																						1					1		1					1	1
		Formicidae.06											1			2
		Formicidae.07							1											1																									1		1
		Formicidae.08																1	5								3	5	2		1				1
		Formicidae.09																		1
		Formicidae.10																						2
		Formicidae.11	2		4		6	1								1						2	1										5		3				1
		Formicidae.12																																				1
		Formicidae.13																											1
		Formicidae.14																									1										1
		Formicidae.15							1																						1	2					2				1
		Formicidae.16									1		1																1		1																5
		Formicidae.17																	1
		Formicidae.18																									2
		Formicidae.19				1			2										1				1
		Formicidae.21																																						2	2
		Formicidae.22																																	1
		Formicidae.23							2									1			1						2		1							1
		Formicidae.24																					1						1						1								1					1
		Formicidae.25																												1									1								1
		Formicidae.26																													1
		Formicidae.27																									1
		Formicidae.28				3					1																		5		14	1	3	1		2
		Formicidae.29	1												1
		Formicidae.31																	6												1		1
		Formicidae.32																															2				1					1
		Formicidae.34										1														1
		Formicidae.35																		1
		Formicidae.36																1
		Formicidae.37																											1
		Formicidae.39																1
		Formicidae.42																									2
		Formicidae.43				1				2															2								2	2
		Formicidae.45		1																								1								1
		Formicidae.46																			3
		Formicidae.47							1																										1
		Formicidae.48																																					1						1	1
		Formicidae.49	43	26	26	5	8	11	100	81	23	12	18	13	69	25	7	1	19	1	3	2	2	5	6		1	7	2	3	7		1	5	3	5			3	4	10	1	6	19	13	15	4	3	1
		Formicidae.50																			1	4											4	5
		Formicidae.51
		Formicidae.52
		Formicidae.53																									1
		Formicidae.55																		1
		Pheidole.01	241	9	149	19	635	31	2	2	1	2	4	1	3	4			1		14	9	14	4	8	7	14	1			3	1	51	4	137	2	12	7	1	1		4		1	3	3	1		1
	Ichneumonidae	Ichneumonidae.01																	1		2												1
		Ichneumonidae.03																			1	1											1							1						1
		Ichneumonidae.04	1						1
		Ichneumonidae.05	1															1
	Pteromalidae	Pteromalidae.02													1
		Pteromalidae.03																									1
	Scelionidae	Scelionidae.01			2																																						1
		Scelionidae.03																																	1
		Scelionidae.04																												1																	1
		Scelionidae.06																	1
	Tetracampidae	Tetracampidae.01													2												1
		Tetracampidae.02					1	1																																					1
		Tetracampidae.03
		Tetracampidae.04																										1
Lepidoptera		Heterocera.01	57	111	66	35	7	25	38	75	6	2	32	72	30	69	32	31	146	46	80	43	22	27	20	66	17	29	32	35	121	60	23	42	103	137	57	88	123	120	8	68	171	137	47	90	108	36	86
		Heterocera.02	4	4	1	2		3	6	3	1		3	2	3	1		2	5		6		1	1	4	9	6		8	1	6		8	3	4	2	3	2	1			1	2	1	2	13	3	1	6
		Lepidoptera.01											1								1	1				2	1				1		6	10					3			1		1		2
		Lepidoptera.02							1																				1		2			1
		Lepidoptera.04																																											1
		Lepidoptera.05																																											1
		Lepidoptera.06																																											1
		Lepidoptera.07																																		1										1
		Lepidoptera.09																									1
		Lepidoptera.11																																						1
Mantodea		Mantodea.01						1																									1
Orthoptera		Orthoptera.01		1														2	1										1		1	2	1	3	1	2						1		1	2	1
		Orthoptera.010					1		2						1																			1
		Orthoptera.02															2	1	2	2								1	2		1	3	2		2	1
		Orthoptera.03			1	2								1	3		3	1	1				1						1	1			1	2														2
		Orthoptera.04		1					1																								3		1
		Orthoptera.06							1
		Orthoptera.07													1			1																1									1
		Orthoptera.08								1					1												2
		Orthoptera.09			1				1	2		2		1														1					1		1
		Orthoptera.11	2	1						2									1								1														1
Total			3684	2369	1391	3396	2991	2032	995	1760	1650	1894	3866	3730	6859	3247	4149	3901	4256	4365	1186	423	910	741	1627	1989	1552	3630	902	3005	2918	5487	2537	1847	2357	1887	5221	3012	2594	1726	180	3219	5906	6050	10860	5480	4003	6810	8033
[truncated: 8 more columns]
